# Supplementary material
Source: PubMed Central journal article supplement (PMC8437678)
Supplement: mmc1.pdf [file mmc1.pdf]

# THE LANCET

## Supplementary appendix

This appendix formed part of the original submission and has been peer reviewed.  
We post it as supplied by the authors.

Supplement to: Krause PR, Fleming TR, Peto R, et al. Considerations in boosting  
COVID-19 vaccine immune responses. *Lancet* 2021; published online Sept 13.  
[http://dx.doi.org/10.1016/S0140-6736\(21\)02046-8](http://dx.doi.org/10.1016/S0140-6736(21)02046-8).

## Supplementary Material

This appendix formed part of the original submission and has been peer reviewed.  
We post it as supplied by the authors.

### Supplement to **Considerations in boosting COVID vaccine immune responses**

Philip R. Krause, M.D., Thomas R. Fleming Ph.D., Richard Peto F.R.S., Ira M. Longini Ph.D., John Peter Figueroa, Ph.D., Jonathan A.C. Sterne Ph.D., Alejandro Cravioto, Ph.D., Helen Rees, M.D., Julian P.T. Higgins, Ph.D., Isabelle Boutron, M.D./Ph.D., Hongchao Pan, Ph.D., Marion F. Gruber, Ph.D., Narendra Arora, M.D., Fatema Kazi, Ph.D., Rogerio Gaspar, Ph.D., Soumya Swaminathan, M.D., Michael J. Ryan, M.D., Ana-Maria Henao-Restrepo, M.D.

## Table of contents

|                                                                                                                                                                                                       |   |
|-------------------------------------------------------------------------------------------------------------------------------------------------------------------------------------------------------|---|
| Search strategy and selection criteria .....                                                                                                                                                          | 2 |
| Statistical methods.....                                                                                                                                                                              | 2 |
| Table S1. Studies reporting vaccine efficacy against any infection (50% to <80%, 80% to <90%, > 90%).....                                                                                             | 3 |
| Table S2. Studies reporting vaccine efficacy against four main variants.....                                                                                                                          | 4 |
| Table S3. Studies reporting vaccine efficacy by type of vaccine (viral vector, inactivated SARS-CoV-2, adjuvanted protein subunit, or mRNA).....                                                      | 5 |
| Table S4. Studies reporting vaccine efficacy early (more recently relative to vaccination) or later (less recently relative to vaccination) during the follow-up of the same observational study..... | 6 |
| Table S5. Additional studies reporting vaccine efficacy only on severe disease .....                                                                                                                  | 7 |
| Table S6. Additional studies reporting vaccine efficacy only on symptomatic disease or infection.....                                                                                                 | 8 |
| References .....                                                                                                                                                                                      | 9 |

### Search strategy and selection criteria

We searched studies reported in English that described an effort to account for confounding variables and reported efficacy or effectiveness of a complete vaccination series against viral variants, or in a time-dependent manner.

We specifically considered all studies indexed by the COVID-NMA initiative<sup>1</sup>, all studies identified by experts and co-authors tasked with summarizing these data at a WHO meeting on August 13, 2021<sup>2</sup>, and all studies referenced by the US Centers for Disease Control in presentations to the Advisory Committee on Immunization Practices on August 13, 2021 and August 30, 2021<sup>3</sup>. In addition, we searched Pubmed, medRxiv and SSRN preprint databases for the terms “COVID vaccine variant efficacy” and “COVID vaccine variant effectiveness”.

Of the identified studies, we excluded preprints published before June 1, 2021 (allowing >3 months for these studies to be peer reviewed and published), and articles that made no clear mention of prevalent variants at the time of the study.

### Statistical methods

For a given set of vaccine efficacy values, each with its variance estimated from its cited 95% confidence interval, the inverse-variance-weighted average the vaccine efficacy values was calculated either by the fixed-effect method (ignoring any between-study variation) or by the DerSimonian-Laird random effect method (which gives similar point estimates but ascribes wider confidence interval to the weighted average).

Both inverse-variance-weighted averages are provided in the supplementary tables, but only the former is plotted in the Figure.

<sup>1</sup> Boutron I, Chaimani A, Meerpohl JJ, et al. The COVID-NMA Project: Building an Evidence Ecosystem for the COVID-19 Pandemic. *Ann Intern Med* 2020; **173**(12): 1015-7.

<sup>2</sup> World Health Organization. Considerations in boosting COVID vaccine immune responses: WHO consultation on COVID-19 vaccines research- 13 August 2021. 2021. <https://www.who.int/news-room/events/detail/2021/08/13/default-calendar/who-consultation-on-covid-19-vaccines-research-13-august-2021>.

<sup>3</sup> Centers for Disease Control and Prevention. ACIP Meeting Information: August 13, 2021. 2021. <https://www.cdc.gov/vaccines/acip/meetings/index.html>.

**Table S1. Studies reporting vaccine efficacy against any infection (50% to <80%, 80% to <90%, ≥ 90%)**

| Group | Vaccine                       | Study Location (reference) | Variant              | Effectiveness vs. severe disease or hospitalization | Lower limit of 95% CI | Upper limit of 95% CI | Effectiveness vs. symptomatic disease or infection | Lower limit of 95% CI | Upper limit of 95% CI |
|-------|-------------------------------|----------------------------|----------------------|-----------------------------------------------------|-----------------------|-----------------------|----------------------------------------------------|-----------------------|-----------------------|
| 1     | BBV152                        | India <sup>1 2</sup>       | All                  | 93.4                                                | 57.1                  | 99.8                  | 77.8                                               | 65.2                  | 86.4                  |
| 1     | BNT162b2                      | Qatar <sup>3</sup>         | Beta                 | 100                                                 | 73.7                  | 100                   | 75                                                 | 70.5                  | 78.9                  |
| 1     | BNT162b2                      | Qatar <sup>4</sup>         | Delta                | 89.7                                                | 61                    | 98.1                  | 53.5                                               | 43.9                  | 61.4                  |
| 1     | BNT162b2                      | Israel <sup>5</sup>        | Mostly Delta         | 91.4                                                | 82.5                  | 95.7                  | 40.5                                               | 8.7                   | 61.2                  |
| 1     | BNT162b2                      | France <sup>6</sup>        | Beta                 | 86                                                  | 67                    | 94                    | 49                                                 | 14                    | 69                    |
| 1     | ChadOx1nCoV-19                | UK <sup>7, 8</sup>         | Delta                | 92                                                  | 75                    | 97                    | 67                                                 | 61                    | 72                    |
| 1     | BNT162b2 or mRNA-1273         | USA <sup>9</sup>           | Epsilon              | 90                                                  | 89                    | 92                    | 73                                                 | 72                    | 74                    |
| 1     | BNT162b2 or mRNA-1273         | USA <sup>9</sup>           | Delta                | 93                                                  | 84                    | 96                    | 75                                                 | 71                    | 78                    |
| 1     | BNT162b2 or mRNA-1273         | Finland <sup>10</sup>      | Beta                 | 93                                                  | 70                    | 98                    | 75                                                 | 65                    | 82                    |
| 1     | BNT162b2 or mRNA-1273         | USA <sup>11</sup>          | B.1.427/ 429 & Alpha | 100                                                 | NA                    | NA                    | 68.3                                               | 27.9                  | 85.7                  |
| 1     | mRNA-1273                     | Canada <sup>12</sup>       | Gamma                | 79                                                  | 48                    | 91                    | 66                                                 | 34                    | 82                    |
| 1     | Ad26.COVS.2                   | Worldwide <sup>13</sup>    | All                  | 83.5                                                | 54.2                  | 96.9                  | 66.5                                               | 55.5                  | 75.1                  |
| 1     | Ad26.COVS.2                   | Worldwide <sup>13</sup>    | Beta                 | 81.7                                                | 46.2                  | 95.4                  | 64                                                 | 41.2                  | 78.7                  |
| 1     | ChadOx1nCoV-19                | Canada <sup>14</sup>       | Alpha                | 85                                                  | 81                    | 88                    | 64                                                 | 60                    | 68                    |
| 1     | ChadOx1nCoV-19                | Canada <sup>14</sup>       | Beta/ Gamma          | 83                                                  | 66                    | 92                    | 48                                                 | 28                    | 63                    |
| 1     | ChadOx1nCoV-19                | Canada <sup>14</sup>       | Delta                | 88                                                  | 60                    | 96                    | 67                                                 | 44                    | 80                    |
| 1     | ChadOx1nCoV-19                | India <sup>15</sup>        | Mostly Delta         | 95                                                  | 44                    | 100                   | 64                                                 | 38                    | 78                    |
| 1     | ChadOx1nCoV-19                | India <sup>16</sup>        | Mostly Delta         | 81.5                                                | 10                    | 99                    | 63.1                                               | 52                    | 72                    |
| 1     | ChadOx1nCoV-19                | UK <sup>8</sup>            | Alpha                | 86                                                  | 53                    | 96                    | 74                                                 | 68                    | 79                    |
| 1     | ChadOx1nCoV-19                | UK <sup>8</sup>            | Delta                | 92                                                  | 75                    | 97                    | 67                                                 | 61                    | 72                    |
| 1     | ChadOx1nCoV-19                | Brazil <sup>17</sup>       | Gamma                | 87.6                                                | 78.2                  | 92.9                  | 77.9                                               | 69.2                  | 84.2                  |
| 1     | Coronavac                     | China <sup>18</sup>        | Delta                | 100                                                 | NA                    | NA                    | 59                                                 | 16                    | 81.6                  |
| 1     | Coronavac                     | Brazil <sup>19</sup>       | Gamma                | 56                                                  | 47                    | 63                    | 47                                                 | 39                    | 54                    |
| 1     | Coronavac                     | Brazil <sup>20</sup>       | Gamma                | 59                                                  | 44                    | 70                    | 42                                                 | 27                    | 53                    |
| 1     | Coronavac                     | Chile <sup>21</sup>        | Alpha/Gamma          | 86.3                                                | 84.5                  | 87.9                  | 66                                                 | 65                    | 67                    |
| 1     | Inactivated vaccines*         | Singapore <sup>22</sup>    | Delta                | 100                                                 | NA                    | NA                    | 69.5                                               | 42.8                  | 96.3                  |
|       | <b>Weighted mean (fixed)</b>  |                            |                      | <b>87.74</b>                                        | <b>86.75</b>          | <b>88.73</b>          | <b>69.35</b>                                       | <b>68.71</b>          | <b>69.99</b>          |
|       | <b>Weighted mean (random)</b> |                            |                      | <b>86.24</b>                                        | <b>82.94</b>          | <b>89.53</b>          | <b>66.42</b>                                       | <b>63.47</b>          | <b>69.37</b>          |
| 2     | BNT162b2                      | Qatar <sup>3</sup>         | Alpha                | 100                                                 | 81.7                  | 100                   | 89.5                                               | 85.9                  | 92.3                  |
| 2     | BNT162b2                      | Canada <sup>23</sup>       | Alpha                | 95                                                  | 92                    | 97                    | 89                                                 | 86                    | 91                    |
| 2     | BNT162b2                      | Canada <sup>14</sup>       | Beta/Gamma           | 95                                                  | 81                    | 99                    | 84                                                 | 69                    | 92                    |
| 2     | BNT162b2                      | UK <sup>8</sup>            | Delta                | 96                                                  | 86                    | 99                    | 88                                                 | 85                    | 90                    |
| 2     | BNT162b2                      | Denmark <sup>24</sup>      | Original and Alpha   | 94                                                  | 90                    | 96                    | 82                                                 | 79                    | 84                    |
| 2     | BNT162b2 or mRNA-1273         | Canada <sup>25</sup>       | Beta/Gamma           | 100                                                 | NA                    | NA                    | 88                                                 | 61                    | 96                    |
| 2     | BNT162b2                      | UK <sup>8</sup>            | Delta                | 96                                                  | 86                    | 99                    | 88                                                 | 85                    | 99                    |
| 2     | ChadOx1nCoV-19                | UK <sup>8</sup>            | Alpha                | 86                                                  | 53                    | 96                    | 88                                                 | 85                    | 99                    |
| 2     | ChadOx1nCoV-19                | Denmark <sup>26</sup>      | Alpha                | 100                                                 | NA                    | NA                    | 88                                                 | 83                    | 92                    |
| 2     | mRNA-1273                     | USA <sup>27</sup>          | Mostly Delta         | 96                                                  | 91                    | 98                    | 88.3                                               | 86                    | 90                    |
| 2     | mRNA-1273                     | Qatar <sup>28</sup>        | Delta                | 100                                                 | 41.2                  | 100                   | 84.8                                               | 75.9                  | 90.8                  |
| 2     | ChadOx1nCoV-19                | UK <sup>29</sup>           | Alpha                | 94                                                  | 81                    | 98                    | 82                                                 | 78                    | 85                    |
| 2     | Covishield & Covaxin          | India <sup>30</sup>        | Delta                | 88                                                  | 55                    | 97                    | 83                                                 | 73                    | 89                    |
|       | <b>Weighted mean (fixed)</b>  |                            |                      | <b>95.60</b>                                        | <b>94.18</b>          | <b>97.02</b>          | <b>86.82</b>                                       | <b>85.84</b>          | <b>87.80</b>          |
|       | <b>Weighted mean (random)</b> |                            |                      | <b>95.60</b>                                        | <b>94.18</b>          | <b>97.02</b>          | <b>86.56</b>                                       | <b>84.69</b>          | <b>88.42</b>          |
| 3     | BNT162b2                      | Israel <sup>31</sup>       | Mostly Alpha         | 97.5                                                | 97.1                  | 97.8                  | 95.3                                               | 94.9                  | 95.7                  |
| 3     | BNT162b2                      | Israel <sup>32</sup>       | Alpha                | 92                                                  | 75                    | 100                   | 94                                                 | 87                    | 98                    |
| 3     | BNT162b2                      | UK <sup>8</sup>            | Alpha                | 95                                                  | 78                    | 99                    | 94                                                 | 92                    | 95                    |
| 3     | BNT162b2                      | Israel <sup>33</sup>       | Alpha                | 94                                                  | 94                    | 95                    | 93                                                 | 92.5                  | 93.4                  |
| 3     | BNT162b2                      | Israel <sup>34</sup>       | Alpha                | 88                                                  | 80                    | 95                    | 90                                                 | 84                    | 94                    |
| 3     | BNT162b2                      | UK <sup>29</sup>           | Alpha                | 98                                                  | 96                    | 99                    | 94                                                 | 92                    | 95                    |
| 3     | BNT162b2                      | Italy <sup>35</sup>        | Original and Alpha   | 98                                                  | 87                    | 100                   | 98                                                 | 97                    | 99                    |
| 3     | BNT162b2 or mRNA-1273         | Canada <sup>25</sup>       | Alpha                | 94                                                  | 59                    | 99                    | 90                                                 | 85                    | 94                    |
| 3     | BNT162b2                      | UK <sup>8</sup>            | Alpha                | 95                                                  | 78                    | 99                    | 94                                                 | 92                    | 95                    |
| 3     | BNT162b2 or mRNA-1273         | USA <sup>36</sup>          | Alpha                | 100                                                 | 97                    | 100                   | 97                                                 | 97                    | 98                    |
| 3     | BNT162b2                      | Israel <sup>37</sup>       | Alpha                | 93                                                  | 92                    | 95                    | 93                                                 | 93                    | 93                    |
| 3     | BNT162b2 or mRNA-1273         | USA <sup>38</sup>          | Alpha                | 89                                                  | 81                    | 93                    | 91                                                 | 87                    | 93                    |
| 3     | mRNA-1273                     | Canada <sup>14</sup>       | Alpha                | 94                                                  | 89                    | 97                    | 92                                                 | 86                    | 96                    |
| 3     | mRNA-1273                     | USA <sup>39</sup>          | All                  | 98.2                                                | 92.8                  | 99.6                  | 93.2                                               | 90                    | 94.8                  |
| 3     | NVX-CoV2373                   | UK <sup>40</sup>           | Mostly Alpha         | 100                                                 | 87                    | 100                   | 90.4                                               | 82.9                  | 94.6                  |
|       | <b>Weighted mean (fixed)</b>  |                            |                      | <b>96.39</b>                                        | <b>96.12</b>          | <b>96.66</b>          | <b>95.01</b>                                       | <b>94.77</b>          | <b>95.24</b>          |
|       | <b>Weighted mean (random)</b> |                            |                      | <b>95.83</b>                                        | <b>94.14</b>          | <b>97.53</b>          | <b>93.97</b>                                       | <b>92.77</b>          | <b>95.17</b>          |

**Table S2. Studies reporting vaccine efficacy against four main variants**

| Vaccine                            | Study Location (reference) | Variant              | Effectiveness vs. severe disease or hospitalization | Lower limit of 95% CI | Upper limit of 95% CI | Effectiveness vs. symptomatic disease or infection | Lower limit of 95% CI | Upper limit of 95% CI |
|------------------------------------|----------------------------|----------------------|-----------------------------------------------------|-----------------------|-----------------------|----------------------------------------------------|-----------------------|-----------------------|
| BNT162b2                           | Qatar <sup>3</sup>         | Alpha                | 100                                                 | 81.7                  | 100                   | 89.5                                               | 85.9                  | 92.3                  |
| BNT162b2                           | Canada <sup>14</sup>       | Alpha                | 95                                                  | 92                    | 97                    | 89                                                 | 86                    | 91                    |
| BNT162b2                           | Israel <sup>31</sup>       | Mostly Alpha         | 97.5                                                | 97.1                  | 97.8                  | 95.3                                               | 94.9                  | 95.7                  |
| BNT162b2                           | Israel <sup>32</sup>       | Alpha                | 92                                                  | 75                    | 100                   | 94                                                 | 87                    | 98                    |
| BNT162b2                           | UK <sup>8</sup>            | Alpha                | 95                                                  | 78                    | 99                    | 94                                                 | 92                    | 95                    |
| BNT162b2                           | Israel <sup>33</sup>       | Alpha                | 94                                                  | 94                    | 95                    | 93                                                 | 92.5                  | 93.4                  |
| BNT162b2                           | Israel <sup>34</sup>       | Alpha                | 88                                                  | 80                    | 95                    | 90                                                 | 84                    | 94                    |
| BNT162b2                           | UK <sup>29</sup>           | Alpha                | 98                                                  | 96                    | 99                    | 94                                                 | 92                    | 95                    |
| BNT162b2                           | Italy <sup>35</sup>        | Original and Alpha   | 98                                                  | 87                    | 100                   | 98                                                 | 97                    | 99                    |
| BNT162b2                           | Denmark <sup>24</sup>      | Original and Alpha   | 94                                                  | 90                    | 96                    | 82                                                 | 79                    | 84                    |
| BNT162b2 or mRNA-1273              | Canada <sup>25</sup>       | Alpha                | 94                                                  | 59                    | 99                    | 90                                                 | 85                    | 94                    |
| BNT162b2 or mRNA-1273              | USA <sup>11</sup>          | B.1.427/ 429 & Alpha | 100                                                 | NA                    | NA                    | 68.3                                               | 27.9                  | 85.7                  |
| BNT162b2                           | UK <sup>8</sup>            | Alpha                | 95                                                  | 78                    | 99                    | 94                                                 | 92                    | 95                    |
| ChadOx1nCoV-19                     | UK <sup>8</sup>            | Alpha                | 86                                                  | 53                    | 96                    | 88                                                 | 85                    | 99                    |
| BNT162b2 or mRNA-1273              | USA <sup>9</sup>           | Epsilon/Alpha        | 90                                                  | 89                    | 92                    | 73                                                 | 72                    | 74                    |
| BNT162b2 or mRNA-1273              | USA <sup>36</sup>          | Alpha                | 100                                                 | 97                    | 100                   | 97                                                 | 97                    | 98                    |
| BNT162b2                           | Israel <sup>37</sup>       | Alpha                | 93                                                  | 92                    | 95                    | 93                                                 | 93                    | 93                    |
| BNT162b2 or mRNA-1273              | USA <sup>38</sup>          | Alpha                | 89                                                  | 81                    | 93                    | 91                                                 | 87                    | 93                    |
| ChadOx1nCoV-19                     | Denmark <sup>26</sup>      | Alpha                | 100                                                 | NA                    | NA                    | 88                                                 | 83                    | 92                    |
| mRNA-1273                          | Canada <sup>14</sup>       | Alpha                | 94                                                  | 89                    | 97                    | 92                                                 | 86                    | 96                    |
| ChadOx1nCoV-19                     | Canada <sup>14</sup>       | Alpha                | 85                                                  | 81                    | 88                    | 64                                                 | 60                    | 68                    |
| ChadOx1nCoV-19                     | UK <sup>8</sup>            | Alpha                | 86                                                  | 53                    | 96                    | 74                                                 | 68                    | 79                    |
| ChadOx1nCoV-19                     | UK <sup>29</sup>           | Alpha                | 94                                                  | 81                    | 98                    | 82                                                 | 78                    | 85                    |
| NVX-CoV2373                        | UK <sup>40</sup>           | Mostly Alpha         | 100                                                 | 87                    | 100                   | 90.4                                               | 82.9                  | 94.6                  |
| Coronavac                          | Chile <sup>21</sup>        | Alpha/Gamma          | 86.3                                                | 84.5                  | 87.9                  | 66                                                 | 65                    | 67                    |
| <b>Weighted mean (fixed)</b>       |                            |                      | <b>95.87</b>                                        | <b>95.61</b>          | <b>96.13</b>          | <b>92.15</b>                                       | <b>91.93</b>          | <b>92.38</b>          |
| <b>Weighted mean (random)</b>      |                            |                      | <b>93.99</b>                                        | <b>92.25</b>          | <b>95.72</b>          | <b>87.30</b>                                       | <b>83.63</b>          | <b>90.97</b>          |
| BNT162b2                           | Qatar <sup>3</sup>         | Beta                 | 100                                                 | 73.7                  | 100                   | 75                                                 | 70.5                  | 78.9                  |
| BNT162b2                           | France <sup>6</sup>        | Beta                 | 86                                                  | 67                    | 94                    | 49                                                 | 14                    | 69                    |
| BNT162b2 or mRNA-1273              | Finland <sup>10</sup>      | Beta                 | 93                                                  | 70                    | 98                    | 75                                                 | 65                    | 82                    |
| Ad26.COVS.2.S                      | Worldwide <sup>13</sup>    | Beta                 | 81.7                                                | 46.2                  | 95.4                  | 64                                                 | 41.2                  | 78.7                  |
| <b>Weighted mean (fixed)</b>       |                            |                      | <b>92.08</b>                                        | <b>84.63</b>          | <b>99.53</b>          | <b>74.12</b>                                       | <b>70.46</b>          | <b>77.78</b>          |
| <b>Weighted mean (random)</b>      |                            |                      | <b>92.08</b>                                        | <b>84.63</b>          | <b>99.53</b>          | <b>72.71</b>                                       | <b>66.49</b>          | <b>78.92</b>          |
| BNT162b2                           | Israel <sup>5</sup>        | Mostly Delta         | 91.4                                                | 82.5                  | 95.7                  | 40.5                                               | 8.7                   | 61.2                  |
| mRNA-1273                          | USA <sup>27</sup>          | Mostly Delta         | 96                                                  | 91                    | 98                    | 88.3                                               | 86                    | 90                    |
| ChadOx1nCoV-19                     | India <sup>15</sup>        | Mostly Delta         | 95                                                  | 44                    | 100                   | 64                                                 | 38                    | 78                    |
| ChadOx1nCoV-19                     | India <sup>16</sup>        | Mostly Delta         | 81.5                                                | 10                    | 99                    | 63.1                                               | 52                    | 72                    |
| BNT162b2                           | Qatar <sup>28</sup>        | Delta                | 89.7                                                | 61                    | 98.1                  | 53.5                                               | 43.9                  | 61.4                  |
| BNT162b2                           | UK <sup>8</sup>            | Delta                | 96                                                  | 86                    | 99                    | 88                                                 | 85                    | 90                    |
| BNT162b2 or mRNA-1273              | USA <sup>9</sup>           | Delta                | 93                                                  | 84                    | 96                    | 75                                                 | 71                    | 78                    |
| mRNA-1273                          | Qatar <sup>28</sup>        | Delta                | 100                                                 | 41.2                  | 100                   | 84.8                                               | 75.9                  | 90.8                  |
| ChadOx1nCoV-19                     | UK <sup>8</sup>            | Delta                | 92                                                  | 75                    | 97                    | 67                                                 | 61                    | 72                    |
| ChadOx1nCoV-19                     | Canada <sup>14*</sup>      | Delta                | 88                                                  | 60                    | 96                    | 67                                                 | 44                    | 80                    |
| ChadOx1nCoV-19                     | UK <sup>8</sup>            | Delta                | 92                                                  | 75                    | 97                    | 67                                                 | 61                    | 72                    |
| Coronavac and China NationalBiotec | China <sup>18</sup>        | Delta                | 100                                                 | NA                    | NA                    | 59                                                 | 16                    | 81.6                  |
| Inactivated vaccines*              | Singapore <sup>22</sup>    | Delta                | 100                                                 | NA                    | NA                    | 69.5                                               | 42.8                  | 96.3                  |
| Covishield & Covaxin               | India <sup>30</sup>        | Delta                | 88                                                  | 55                    | 97                    | 83                                                 | 73                    | 89                    |
| <b>Weighted mean (fixed)</b>       |                            |                      | <b>94.52</b>                                        | <b>92.33</b>          | <b>96.70</b>          | <b>82.63</b>                                       | <b>81.39</b>          | <b>83.88</b>          |
| <b>Weighted mean (random)</b>      |                            |                      | <b>94.52</b>                                        | <b>92.33</b>          | <b>96.70</b>          | <b>73.38</b>                                       | <b>67.42</b>          | <b>79.34</b>          |
| BNT162b2                           | Canada <sup>14</sup>       | Beta/Gamma           | 95                                                  | 81                    | 99                    | 84                                                 | 69                    | 92                    |
| BNT162b2 or mRNA-1273              | Canada <sup>25</sup>       | Beta/Gamma           | 100                                                 | NA                    | NA                    | 88                                                 | 61                    | 96                    |
| mRNA-1273                          | Canada <sup>12</sup>       | Gamma                | 79                                                  | 48                    | 91                    | 66                                                 | 34                    | 82                    |
| ChadOx1nCoV-19                     | Canada <sup>14*</sup>      | Beta/Gamma           | 83                                                  | 66                    | 92                    | 48                                                 | 28                    | 63                    |
| ChadOx1nCoV-19                     | Brazil <sup>17</sup>       | Gamma                | 87.6                                                | 78.2                  | 92.9                  | 77.9                                               | 69.2                  | 84.2                  |
| Coronavac                          | Brazil <sup>19</sup>       | Gamma                | 56                                                  | 47                    | 63                    | 47                                                 | 39                    | 54                    |
| Coronavac                          | Brazil <sup>19</sup>       | Gamma                | 59                                                  | 44                    | 70                    | 42                                                 | 27                    | 53                    |
| <b>Weighted mean (fixed)</b>       |                            |                      | <b>78.55</b>                                        | <b>74.59</b>          | <b>82.51</b>          | <b>63.92</b>                                       | <b>59.74</b>          | <b>68.10</b>          |
| <b>Weighted mean (random)</b>      |                            |                      | <b>79.66</b>                                        | <b>65.94</b>          | <b>93.37</b>          | <b>64.60</b>                                       | <b>49.63</b>          | <b>79.57</b>          |

**Table S3. Studies reporting vaccine efficacy by type of vaccine (viral vector, inactivated SARS-CoV-2, adjuvanted protein subunit, or mRNA).**

| Vaccine                       | Study Location (reference) | Variant                | Effectiveness vs. severe disease or hospitalization | Lower limit of 95% CI | Upper limit of 95% CI | Effectiveness vs. symptomatic disease or infection | Lower limit of 95% CI | Upper limit of 95% CI |
|-------------------------------|----------------------------|------------------------|-----------------------------------------------------|-----------------------|-----------------------|----------------------------------------------------|-----------------------|-----------------------|
| BNT162b2                      | Qatar <sup>3</sup>         | Alpha                  | 100                                                 | 81.7                  | 100                   | 89.5                                               | 85.9                  | 92.3                  |
| BNT162b2                      | Qatar <sup>3</sup>         | Beta                   | 100                                                 | 73.7                  | 100                   | 75                                                 | 70.5                  | 78.9                  |
| BNT162b2                      | Qatar <sup>28</sup>        | Delta                  | 89.7                                                | 61                    | 98.1                  | 53.5                                               | 43.9                  | 61.4                  |
| BNT162b2                      | Canada <sup>14</sup>       | Alpha                  | 95                                                  | 92                    | 97                    | 89                                                 | 86                    | 91                    |
| BNT162b2                      | Canada <sup>14</sup>       | Beta/Gamma             | 95                                                  | 81                    | 99                    | 84                                                 | 69                    | 92                    |
| BNT162b2                      | Israel <sup>31</sup>       | Mostly Alpha           | 97.5                                                | 97.1                  | 97.8                  | 95.3                                               | 94.9                  | 95.7                  |
| BNT162b2                      | Israel <sup>5</sup>        | Mostly Delta           | 91.4                                                | 82.5                  | 95.7                  | 40.5                                               | 8.7                   | 61.2                  |
| BNT162b2                      | Israel <sup>32</sup>       | Alpha                  | 92                                                  | 75                    | 100                   | 94                                                 | 87                    | 98                    |
| BNT162b2                      | UK <sup>8</sup>            | Alpha                  | 95                                                  | 78                    | 99                    | 94                                                 | 92                    | 95                    |
| BNT162b2                      | UK <sup>8</sup>            | Delta                  | 96                                                  | 86                    | 99                    | 88                                                 | 85                    | 90                    |
| BNT162b2                      | Israel <sup>33</sup>       | Alpha                  | 94                                                  | 94                    | 95                    | 93                                                 | 92.5                  | 93.4                  |
| BNT162b2                      | Israel <sup>34</sup>       | Alpha                  | 88                                                  | 80                    | 95                    | 90                                                 | 84                    | 94                    |
| BNT162b2                      | UK <sup>29</sup>           | Alpha                  | 98                                                  | 96                    | 99                    | 94                                                 | 92                    | 95                    |
| BNT162b2                      | France <sup>6</sup>        | Beta                   | 86                                                  | 67                    | 94                    | 49                                                 | 14                    | 69                    |
| BNT162b2                      | Italy <sup>35</sup>        | Original and Alpha     | 98                                                  | 87                    | 100                   | 98                                                 | 97                    | 99                    |
| BNT162b2                      | Denmark <sup>24</sup>      | Original and Alpha     | 94                                                  | 90                    | 96                    | 82                                                 | 79                    | 84                    |
| BNT162b2 or mRNA-1273         | Canada <sup>25</sup>       | Alpha                  | 94                                                  | 59                    | 99                    | 90                                                 | 85                    | 94                    |
| BNT162b2 or mRNA-1273         | Canada <sup>25</sup>       | Beta/Gamma             | 100                                                 | NA                    | NA                    | 88                                                 | 61                    | 96                    |
| BNT162b2 or mRNA-1273         | USA <sup>11</sup>          | B.1.427/ 429 and Alpha | 100                                                 | NA                    | NA                    | 68.3                                               | 27.9                  | 85.7                  |
| BNT162b2                      | UK <sup>8</sup>            | Alpha                  | 95                                                  | 78                    | 99                    | 94                                                 | 92                    | 95                    |
| BNT162b2                      | UK <sup>8</sup>            | Delta                  | 96                                                  | 86                    | 99                    | 88                                                 | 85                    | 99                    |
| BNT162b2 or mRNA-1273         | USA <sup>9</sup>           | Epsilon                | 90                                                  | 89                    | 92                    | 73                                                 | 72                    | 74                    |
| BNT162b2 or mRNA-1273         | USA <sup>9</sup>           | Delta                  | 93                                                  | 84                    | 96                    | 75                                                 | 71                    | 78                    |
| BNT162b2 or mRNA-1273         | USA <sup>36</sup>          | Alpha                  | 100                                                 | 97                    | 100                   | 97                                                 | 97                    | 98                    |
| Pfizer BNT162b2               | Israel <sup>37</sup>       | Alpha                  | 93                                                  | 92                    | 95                    | 93                                                 | 93                    | 93                    |
| BNT162b2 or mRNA-1273         | USA <sup>38</sup>          | Alpha                  | 89                                                  | 81                    | 93                    | 91                                                 | 87                    | 93                    |
| BNT162b2 or mRNA-1273         | Finland <sup>10</sup>      | Beta                   | 93                                                  | 70                    | 98                    | 75                                                 | 65                    | 82                    |
| mRNA-1273                     | USA <sup>27</sup>          | Mostly Delta           | 96                                                  | 91                    | 98                    | 88.3                                               | 86                    | 90                    |
| mRNA-1273                     | Canada <sup>14</sup>       | Alpha                  | 94                                                  | 89                    | 97                    | 92                                                 | 86                    | 96                    |
| mRNA-1273                     | Qatar <sup>28</sup>        | Delta                  | 100                                                 | 41.2                  | 100                   | 84.8                                               | 75.9                  | 90.8                  |
| mRNA-1273                     | USA <sup>39</sup>          | All                    | 98.2                                                | 92.8                  | 99.6                  | 93.2                                               | 90                    | 94.8                  |
| mRNA-1273                     | Canada <sup>12</sup>       | Gamma                  | 79                                                  | 48                    | 91                    | 66                                                 | 34                    | 82                    |
| <b>Weighted mean (fixed)</b>  |                            |                        | <b>96.14</b>                                        | <b>95.88</b>          | <b>96.40</b>          | <b>93.39</b>                                       | <b>93.16</b>          | <b>93.61</b>          |
| <b>Weighted mean (random)</b> |                            |                        | <b>94.88</b>                                        | <b>93.49</b>          | <b>96.27</b>          | <b>86.84</b>                                       | <b>84.38</b>          | <b>89.31</b>          |
| Bharat BBV152                 | India <sup>1,2</sup>       | All                    | 93.4                                                | 57.1                  | 99.8                  | 77.8                                               | 65.2                  | 86.4                  |
| Coronavac                     | China <sup>18</sup>        | Delta                  | 100                                                 | NA                    | NA                    | 59                                                 | 16                    | 81.6                  |
| Coronavac                     | Brazil <sup>19</sup>       | Gamma                  | 56                                                  | 47                    | 63                    | 47                                                 | 39                    | 54                    |
| Coronavac                     | Brazil <sup>17</sup>       | Gamma                  | 59                                                  | 44                    | 70                    | 42                                                 | 27                    | 53                    |
| Coronavac                     | Chile <sup>21</sup>        | Alpha/Gamma            | 86.3                                                | 84.5                  | 87.9                  | 66                                                 | 65                    | 67                    |
| Inactivated vaccines*         | Singapore <sup>22</sup>    | Delta                  | 100                                                 | NA                    | NA                    | 69.5                                               | 42.8                  | 96.3                  |
| Covishield & Covaxin          | India <sup>30</sup>        | Delta                  | 88                                                  | 55                    | 97                    | 83                                                 | 73                    | 89                    |
| <b>Weighted mean (fixed)</b>  |                            |                        | <b>84.74</b>                                        | <b>83.11</b>          | <b>86.38</b>          | <b>65.89</b>                                       | <b>64.92</b>          | <b>66.87</b>          |
| <b>Weighted mean (random)</b> |                            |                        | <b>80.69</b>                                        | <b>65.81</b>          | <b>95.57</b>          | <b>63.79</b>                                       | <b>53.47</b>          | <b>74.12</b>          |
| ChadOx1nCoV-19                | UK <sup>8</sup>            | Alpha                  | 86                                                  | 53                    | 96                    | 88                                                 | 85                    | 99                    |
| ChadOx1nCoV-19                | UK <sup>8</sup>            | Delta                  | 92                                                  | 75                    | 97                    | 67                                                 | 61                    | 72                    |
| ChadOx1nCoV-19                | Denmark <sup>26</sup>      | Alpha                  | 100                                                 | NA                    | NA                    | 88                                                 | 83                    | 92                    |
| Ad26.COVS.2                   | Worldwide <sup>13</sup>    | All                    | 83.5                                                | 54.2                  | 96.9                  | 66.5                                               | 55.5                  | 75.1                  |
| Ad26.COVS.2                   | Worldwide <sup>13</sup>    | Beta                   | 81.7                                                | 46.2                  | 95.4                  | 64                                                 | 41.2                  | 78.7                  |
| ChadOx1nCoV-19                | Canada <sup>14*</sup>      | Alpha                  | 85                                                  | 81                    | 88                    | 64                                                 | 60                    | 68                    |
| ChadOx1nCoV-19                | Canada <sup>14*</sup>      | Beta/Gamma             | 83                                                  | 66                    | 92                    | 48                                                 | 28                    | 63                    |
| ChadOx1nCoV-19                | Canada <sup>14*</sup>      | Delta                  | 88                                                  | 60                    | 96                    | 67                                                 | 44                    | 80                    |
| ChadOx1nCoV-19                | India <sup>15</sup>        | Mostly Delta           | 95                                                  | 44                    | 100                   | 64                                                 | 38                    | 78                    |
| ChadOx1nCoV-19                | India <sup>16</sup>        | Mostly Delta           | 81.5                                                | 10                    | 99                    | 63.1                                               | 52                    | 72                    |
| ChadOx1nCoV-19                | UK <sup>8</sup>            | Alpha                  | 86                                                  | 53                    | 96                    | 74                                                 | 68                    | 79                    |
| ChadOx1nCoV-19                | UK <sup>8</sup>            | Delta                  | 92                                                  | 75                    | 97                    | 67                                                 | 61                    | 72                    |
| ChadOx1nCoV-19                | UK <sup>29</sup>           | Alpha                  | 94                                                  | 81                    | 98                    | 82                                                 | 78                    | 85                    |
| ChadOx1nCoV-19                | Brazil <sup>17</sup>       | Gamma                  | 87.6                                                | 78.2                  | 92.9                  | 77.9                                               | 69.2                  | 84.2                  |
| <b>Weighted mean (fixed)</b>  |                            |                        | <b>90.20</b>                                        | <b>87.95</b>          | <b>92.44</b>          | <b>74.73</b>                                       | <b>73.07</b>          | <b>76.39</b>          |
| <b>Weighted mean (random)</b> |                            |                        | <b>89.87</b>                                        | <b>85.30</b>          | <b>94.43</b>          | <b>71.47</b>                                       | <b>65.73</b>          | <b>77.20</b>          |
| NVX-CoV2373                   | UK <sup>40</sup>           | Mostly Alpha           | 100                                                 | 87                    | 100                   | 90.4                                               | 82.9                  | 94.6                  |

\*Only one dose of two dose series given

**Table S4. Studies reporting vaccine efficacy early (more recently relative to vaccination) or later (less recently relative to vaccination) during the follow-up of the same observational study.**

| Period | Vaccine                          | Study Location (reference)   | Time period of vaccination | Time period of assessment | Effectiveness vs. severe disease or hospitalization | Lower limit of 95% CI | Upper limit of 95% CI | Effectiveness vs. symptomatic disease or infection | Lower limit of 95% CI | Upper limit of 95% CI |
|--------|----------------------------------|------------------------------|----------------------------|---------------------------|-----------------------------------------------------|-----------------------|-----------------------|----------------------------------------------------|-----------------------|-----------------------|
| Early  | BNT162b2                         | USA Minnesota <sup>41</sup>  | before July                | Jan-July                  | 85                                                  | 73                    | 93                    | 76                                                 | 69                    | 81                    |
| Early  | BNT162b2                         | Israel <sup>5</sup>          | March                      | 6/20-7/17/21              | 94                                                  | 80                    | 98                    | 69                                                 | 50                    | 80                    |
| Early  | BNT162b2                         | Israel <sup>5</sup>          | April                      | 6/20-7/17/21              | 84                                                  | 24                    | 96                    | 79                                                 | 61                    | 88                    |
| Early  | mRNA-1273                        | USA Minnesota <sup>41</sup>  | before July                | Jan-July                  | 91.6                                                | 81                    | 97                    | 86                                                 | 81                    | 91                    |
| Early  | BNT162b2; mRNA-1273; Ad26.COV2.S | USA New York <sup>42</sup>   | before May                 | May                       | 95.3                                                | 94.4                  | 96                    | 91.7                                               | 91                    | 92.3                  |
| Early  | BNT162b2                         | Israel <sup>43</sup>         | Mar (40-59 y)              | 7/11-7/31/21              | 98                                                  | 94                    | 99                    | 74                                                 | 70                    | 77                    |
| Early  | BNT162b2                         | Israel <sup>43</sup>         | Mar (60+ y)                | 7/11-7/31/21              | 91                                                  | 85                    | 95                    | 72                                                 | 70                    | 77                    |
| Early  | BNT162b2; mRNA-1273; Ad26.COV2.S | USA <sup>42, 44</sup>        | Before June                | April 4–June 19           | 92.5                                                | 91.2                  | 93.6                  | 91.0                                               | 87.2                  | 93.7                  |
|        | <b>Weighted mean (fixed)</b>     |                              |                            |                           | <b>94.55</b>                                        | <b>93.92</b>          | <b>95.18</b>          | <b>90.24</b>                                       | <b>89.63</b>          | <b>90.85</b>          |
|        | <b>Weighted mean (random)</b>    |                              |                            |                           | <b>93.92</b>                                        | <b>91.78</b>          | <b>96.07</b>          | <b>80.46</b>                                       | <b>73.14</b>          | <b>87.77</b>          |
| Later  | BNT162b2                         | USA Minnesota <sup>41</sup>  | before July                | July (>70% delta)         | 75                                                  | 24                    | 94                    | 42                                                 | 13                    | 62                    |
| Later  | BNT162b2                         | Israel <sup>5</sup>          | Jan                        | 6/20-7/17/21              | 86                                                  | 70                    | 93                    | 16                                                 | -12                   | 45                    |
| Later  | BNT162b2                         | Israel <sup>5</sup>          | Feb                        | 6/20-7/17/21              | 91                                                  | 78                    | 96                    | 44                                                 | 13                    | 63                    |
| Later  | mRNA-1273                        | USA Minnesota <sup>41</sup>  | Before July                | July (>70% delta)         | 81                                                  | 33                    | 96                    | 76                                                 | 58                    | 97                    |
| Later  | BNT162b2; mRNA-1273; Ad26.COV2.S | USA New York <sup>42</sup>   | Before June                | June                      | 93.3                                                | 91.6                  | 94.6                  | 89.7                                               | 88.4                  | 90.8                  |
| Later  | BNT162b2; mRNA-1273; Ad26.COV2.S | USA New York <sup>42</sup>   | Before July                | July (>70% delta)         | 94.4                                                | 92.7                  | 95.7                  | 82.4                                               | 81                    | 83.7                  |
| Later  | BNT162b2                         | Israel <sup>43</sup>         | Jan (40-59 y)              | 7/11-7/31/21              | 94                                                  | 87                    | 97                    | 58                                                 | 54                    | 62                    |
| Later  | BNT162b2                         | Israel <sup>43</sup>         | Jan (60+ y)                | 7/11-7/31/21              | 86                                                  | 82                    | 90                    | 57                                                 | 52                    | 62                    |
| Later  | BNT162b2                         | Israel <sup>43</sup>         | Feb (40-59 y)              | 7/11-7/31/21              | 98                                                  | 95                    | 99                    | 63                                                 | 59                    | 66                    |
| Later  | BNT162b2                         | Israel <sup>43</sup>         | Feb (60+ y)                | 7/11-7/31/21              | 88                                                  | 84                    | 91                    | 65                                                 | 57                    | 71                    |
| Later  | BNT162b2; mRNA-1273; Ad26.COV2.S | USA <sup>42, 44</sup>        | Before July                | June 20–July 17           | 90.4                                                | 87.7                  | 92.5                  | 78.3                                               | 60.0                  | 88.2                  |
|        | <b>Weighted mean (fixed)</b>     |                              |                            |                           | <b>93.42</b>                                        | <b>92.61</b>          | <b>94.24</b>          | <b>82.63</b>                                       | <b>81.81</b>          | <b>83.46</b>          |
|        | <b>Weighted mean (random)</b>    |                              |                            |                           | <b>91.84</b>                                        | <b>89.42</b>          | <b>94.26</b>          | <b>64.93</b>                                       | <b>56.53</b>          | <b>73.33</b>          |
|        | BNT162b2 and mRNA-1273           | USA California <sup>45</sup> | March                      |                           |                                                     |                       |                       | 93.9                                               | 78                    | 98                    |
|        | BNT162b2 and mRNA-1273           | USA California <sup>45</sup> | April                      |                           |                                                     |                       |                       | 96.2                                               | 89                    | 98                    |
|        | BNT162b2 and mRNA-1273           | USA California <sup>45</sup> | May                        |                           |                                                     |                       |                       | 95.9                                               | 85                    | 99                    |
|        | BNT162b2 and mRNA-1273           | USA California <sup>45</sup> | June                       |                           |                                                     |                       |                       | 94.3                                               | 84                    | 98                    |
|        | BNT162b2 and mRNA-1273           | USA California <sup>45</sup> | July                       |                           |                                                     |                       |                       | 65.5                                               | 49                    | 77                    |

Excludes Israel <sup>46</sup> (BNT162b2), as it did not give the vaccine efficacies in the two time periods it studied.

**Table S5. Additional studies reporting vaccine efficacy only on severe disease**

| Vaccine                       | Study design  | Study location (reference) | Variants addressed                  | Effectiveness vs. severe disease or hospitalization (95% CIs) |
|-------------------------------|---------------|----------------------------|-------------------------------------|---------------------------------------------------------------|
| BNT162b2                      | Observational | Qatar <sup>3</sup>         | All                                 | 97% (92-100)                                                  |
| BNT162b2                      | Observational | USA <sup>47</sup>          | Original                            | 85% (74-91)                                                   |
| BNT162b2                      | Observational | USA <sup>48</sup>          | Alpha                               | 89% (79-94)                                                   |
| BNT162b2                      | Observational | USA <sup>49</sup>          | All including Delta                 | 94%                                                           |
| BNT162b2 or mRNA-1273         | Observational | Singapore <sup>22</sup>    | Delta                               | 93% (66-98)                                                   |
| BNT162b2                      | Observational | USA <sup>50</sup>          | Delta                               | 87% (85-90)                                                   |
| mRNA-1273                     | Observational | Qatar <sup>51</sup>        | All                                 | 96% (73-100)                                                  |
| mRNA-1273                     | Observational | USA <sup>48</sup>          | Alpha                               | 92% (82-97)                                                   |
| mRNA-1273                     | Observational | Qatar <sup>51</sup>        | All                                 | 96% (73-100)                                                  |
| mRNA-1273                     | Observational | USA <sup>48</sup>          | Alpha                               | 92% (82-97)                                                   |
| Gam-COVID-Vac                 | Observational | Russia <sup>52</sup>       | Delta mostly                        | 81% (68-88)                                                   |
| Inactivated COVID-19 vaccines | Observational | China <sup>53</sup>        | Delta                               | 89% (55-98)                                                   |
| mRNA-1273                     | Observational | USA <sup>50</sup>          | Delta                               | 91% (89-93)                                                   |
| Ad26.COV2.S                   | Observational | US <sup>50</sup>           | Delta                               | 68% (50-79)                                                   |
| BNT162b2 or mRNA-1273         | Observational | Portugal <sup>54</sup>     | Alpha (Feb-Mar), Delta (May onward) | 94% (88-97) Hospitalization, 65-79 years                      |
| BNT162b2 or mRNA-1273         | Observational | Portugal <sup>54</sup>     | Alpha (Feb-Mar), Delta (May onward) | 96% (92-98) Death, 65-79 years                                |
| BNT162b2 or mRNA-1273         | Observational | Portugal <sup>54</sup>     | Alpha (Feb-Mar), Delta (May onward) | 82% (72-89) Hospitalization, 80+ years                        |
| BNT162b2 or mRNA-1273         | Observational | Portugal <sup>54</sup>     | Alpha (Feb-Mar), Delta (May onward) | 81% (74-87) Death, 80+ years                                  |
| BNT162b2 or mRNA-1273         | Observational | USA <sup>48</sup>          | Original and Alpha                  | 86.6% (79-91.4), hospitalization, adults                      |
| BNT162b2                      | Observational | USA <sup>48</sup>          | Original and Alpha                  | 84.7% /74.1-91) hospitalization, adults                       |
| mRNA-1273                     | Observational | USA <sup>48</sup>          | Original and Alpha                  | 88.9% (78.7-94) hospitalization, adults                       |
| BNT162b2 or mRNA-1273         | Observational | USA <sup>48</sup>          | Alpha                               | 92.1% (82.3-96.5), hospitalization, adults                    |
| BNT162b2                      | Observational | USA <sup>55</sup>          | Mostly Delta                        | 80% (73-85)                                                   |
| mRNA-1273                     | Observational | USA <sup>55</sup>          | Mostly Delta                        | 95% (92-97)                                                   |
| Ad26.COV2.S                   | Observational | USA <sup>55</sup>          | Mostly Delta                        | 60% (31-77)                                                   |
| BNT162b2                      | Observational | USA <sup>56</sup>          |                                     | 83.4% (74-89)                                                 |
| mRNA-1273                     | Observational | USA <sup>56</sup>          |                                     | 91.6% (84-96)                                                 |
| mRNA-1273                     | Observational | USA <sup>56</sup>          | Feb 1-June 30 (pre-Delta)           | 84.1% (74-90)                                                 |
| mRNA-1273                     | Observational | USA <sup>56</sup>          | July 1-Aug 6 (Delta)                | 89% (80-94)                                                   |
| mRNA-1273                     | Observational | USA <sup>56</sup>          | <90 days since vaccination          | 86.1% (77-92)                                                 |
| mRNA-1273                     | Observational | USA <sup>56</sup>          | >90 days since vaccination          | 87.2% (78-93)                                                 |
| BNT162b2 or mRNA-1273         | Observational | USA <sup>57</sup>          | 2-12 wks since vaccination          | 86% (82-88)                                                   |
| BNT162b2 or mRNA-1273         | Observational | USA <sup>57</sup>          | 13-24 wks since vaccination         | 84% (77-90)                                                   |



**Table S6. Additional studies reporting vaccine efficacy only on symptomatic disease or infection**

| Vaccine                                     | Study design  | Study location (reference)       | Variants addressed                           | Effectiveness vs. symptomatic disease or infection (i) (95% CIs)    |
|---------------------------------------------|---------------|----------------------------------|----------------------------------------------|---------------------------------------------------------------------|
| Ad26.COV2.S                                 | Observational | USA <sup>58</sup>                | Delta                                        | 51% (-2-76)                                                         |
| Ad26.COV2.S                                 | Observational | Italy <sup>59</sup>              | Delta                                        | 96.0% (82.2–99)                                                     |
| BBV152                                      | Observational | India <sup>1, 2*</sup>           | Delta                                        | 65% (33-83)                                                         |
| BNT162b2 and mRNA-1273                      | Observational | Qatar <sup>3</sup>               | Original, Alpha, and Beta                    | 78 (72-83)                                                          |
| BNT162b2 and mRNA-1273                      | Observational | Qatar <sup>3</sup>               | Original, Alpha, and Beta                    | 78 (72-83)                                                          |
| BNT162b2 or mRNA-1273                       | Observational | USA <sup>60</sup>                | Non-VOC and Alpha                            | 91 (83-95)                                                          |
| BNT162b2                                    | Observational | USA <sup>36</sup>                | Alpha and Original                           | 96 (96-97)                                                          |
| BNT162b2                                    | Observational | Israel <sup>61</sup>             | Alpha and Original**                         | 81% (60-93)(I)                                                      |
| BNT162b2                                    | Observational | Kuwait <sup>62</sup>             | Alpha mostly                                 | 94.5% (89.4-97.2) (I)                                               |
| BNT162b2                                    | Observational | UK <sup>63</sup>                 | Alpha mostly                                 | 78% (68-84) (i)                                                     |
| BNT162b2 and mRNA-1273                      | Observational | Canada <sup>64</sup>             | Alpha and Gamma                              | 79% (65-88), 2 dose                                                 |
| BNT162b2, ChadOx1, mRNA-1273                | Observational | Norway <sup>65</sup>             | Alpha                                        | 84% (82–87), fully vaccinated, infection                            |
| BNT162b2                                    | Observational | Israel <sup>66</sup>             | Alpha                                        | 96% (50-100), 2 dose, symptomatic                                   |
| BNT162b2                                    | Observational | Israel <sup>67</sup>             | Alpha                                        | 98% (94-100)                                                        |
| BNT162b2                                    | Observational | Israel <sup>43</sup>             | Alpha                                        | 89% (82-94)                                                         |
| BNT162b2                                    | Observational | Israel <sup>68, 69</sup>         | Alpha                                        | 89% (82-94)                                                         |
| BNT162b2                                    | Observational | UK <sup>7</sup>                  | Alpha                                        | 85% (74–96), 2 dose, infection                                      |
| BNT162b2                                    | Observational | UK <sup>70, 71</sup>             | Alpha                                        | 95% (91-98)                                                         |
| BNT162b2                                    | Observational | Scotland <sup>72</sup>           | Alpha                                        | 92% (90-93)                                                         |
| BNT162b2                                    | Observational | UK <sup>73-75</sup>              | Alpha                                        | 94% (92-95)                                                         |
| BNT162b2 and mRNA-1273                      | Observational | Canada <sup>76, 77</sup>         | Alpha                                        | 67% (57-75)#                                                        |
| BNT162b2 and mRNA-1273                      | Observational | Canada <sup>78</sup>             | Alpha                                        | 93% (87-96)                                                         |
| BNT162b2 or ChadOx1                         | Observational | UK <sup>79</sup>                 | Alpha                                        | 90% (62-98)                                                         |
| BNT162b2                                    | Observational | Qatar <sup>3</sup>               | Alpha                                        | 90% (86-92) (i)                                                     |
| BNT162b2 mRNA                               | Observational | Western Europe <sup>80</sup>     | Alpha                                        | 87% (74– 93)                                                        |
| BNT162b2                                    | Observational | France <sup>81</sup>             | Beta                                         | 50% (34-73)*                                                        |
| BNT162b2                                    | Observational | Qatar <sup>3</sup>               | Beta                                         | 75% (71-79) (i)                                                     |
| BNT162b2 and mRNA-1273                      | Observational | Canada <sup>64,82</sup>          | Alpha and Gamma                              | 79.2% (64.6-87.8) (I)                                               |
| BNT162b2                                    | Observational | Canada <sup>12</sup>             | Gamma                                        | 26% (-158-79)                                                       |
| BNT162b2 and mRNA-1273                      | Observational | Canada <sup>76</sup>             | Gamma                                        | 61% (45-72)#                                                        |
| BNT162b2                                    | Observational | UK <sup>63</sup>                 | Delta mostly                                 | 82% (79-85) (i)                                                     |
| BNT162b2                                    | Observational | Scotland <sup>72</sup>           | Delta                                        | 79% (75-82)                                                         |
| BNT162b2, ChadOx1, mRNA-1273                | Observational | Norway <sup>65</sup>             | Delta                                        | 65% (61–68), fully vaccinated, infection                            |
| BNT162b2                                    | Observational | UK <sup>74</sup>                 | Delta                                        | 88% (85-90)                                                         |
| mRNA vaccines                               | Observational | France <sup>6</sup>              | Alpha                                        | 88% (82-91), 2D, symptomatic, age 18-54 years                       |
| mRNA vaccines                               | Observational | France <sup>6</sup>              | Alpha                                        | 88% (80-92), 2D, symptomatic, age 55+ years                         |
| mRNA vaccines                               | Observational | France <sup>6</sup>              | Beta and Gamma                               | 83% (68-91), 2D, symptomatic, age 18-54 years                       |
| mRNA vaccines                               | Observational | France <sup>6</sup>              | Beta and Gamma                               | 76 (47-89), 2D symp, age 55+ years                                  |
| mRNA-1273                                   | Observational | Qatar <sup>51</sup>              | Alpha                                        | 100% (92-100) (i)                                                   |
| mRNA-1273                                   | Observational | USA <sup>36</sup>                | Alpha and Original                           | 98 (98-99)                                                          |
| mRNA-1273                                   | Observational | Qatar <sup>51</sup>              | Beta                                         | 96% (92-99) (i)                                                     |
| mRNA vaccines                               | Observational | France <sup>6</sup>              | Alpha                                        | 88% (82-91), 2D, symptomatic, age 18-54 years                       |
| mRNA vaccines                               | Observational | France <sup>6</sup>              | Alpha                                        | 88% (80-92), 2D, symptomatic, age 55+ years                         |
| mRNA vaccines                               | Observational | France <sup>6</sup>              | Beta and Gamma                               | 83% (68-91), 2D, symptomatic, age 18-54 years                       |
| mRNA vaccines                               | Observational | France <sup>6</sup>              | Beta and Gamma                               | 76 (47-89), 2D symp, age 55+ years                                  |
| mRNA-1273                                   | Observational | Qatar <sup>51</sup>              | Alpha                                        | 100% (92-100) (i)                                                   |
| mRNA-1273                                   | Observational | USA <sup>36</sup>                | Alpha and Original                           | 98 (98-99)                                                          |
| mRNA-1273                                   | Observational | Qatar <sup>51</sup>              | Beta                                         | 96% (92-99) (i)                                                     |
| ChAdOx1                                     | Observational | Scotland <sup>72</sup>           | Alpha                                        | 73% (66-78)                                                         |
| ChAdOx1                                     | RCT           | UK <sup>83,84</sup>              | Alpha                                        | 70% (44-85)                                                         |
| ChAdOx1                                     | Observational | UK <sup>74</sup>                 | Alpha                                        | 75% (68-79)                                                         |
| ChAdOx1                                     | Observational | UK <sup>63</sup>                 | Alpha mostly                                 | 79% (56-90) (i)                                                     |
| ChAdOx1                                     | Observational | South Africa <sup>85</sup>       | Beta                                         | 10% (-76- 55)                                                       |
| ChAdOx1                                     | Observational | India <sup>86</sup>              | Delta                                        | 0.83 (0.72-0.97) OR, 2 dose, infection                              |
| ChAdOx1                                     | Observational | Scotland <sup>72</sup>           | Delta                                        | 60% (53-66)                                                         |
| ChAdOx1                                     | Observational | UK <sup>74</sup>                 | Delta                                        | 67% (61-72)                                                         |
| ChAdOx1                                     | Observational | UK <sup>63</sup>                 | Delta mostly                                 | 67% (62-71) (i)                                                     |
| ChAdOx1-S; BNT162b2; mRNA-1273; Ad26.COV2.S | Observational | Netherlands <sup>87</sup>        | Mostly Alpha                                 | 75% (72-78) (i)                                                     |
| Coronavac                                   | Observational | Brazil <sup>19</sup>             | Gamma                                        | 37% (-55-74), 2 dose, symptomatic                                   |
| NVX-CoV2373                                 | RCT           | UK <sup>40</sup>                 | Alpha                                        | 86% (71, 94)                                                        |
| NVX-CoV2373                                 | RCT           | South Africa <sup>88</sup>       | Beta                                         | 51% (-1 – 76)                                                       |
| BNT162b2                                    | Observational | USA <sup>89</sup>                | Non-VOC and Alpha (before Delta circulation) | 74.2% (69–78.7), documented infection                               |
| mRNA-1273                                   | Observational | USA <sup>89</sup>                | Non-VOC and Alpha (before Delta circulation) | 74.7%(66.2-81.1), documented infection                              |
| BNT162b2                                    | Observational | USA <sup>89</sup>                | Alpha (Delta circulating but not dominant)   | 66.5% (58.3-73.1), documented infection                             |
| mRNA-1273                                   | Observational | USA <sup>89</sup>                | Alpha (Delta circulating but not dominant)   | 70.4% (60.1-78.0), documented infection                             |
| BNT162b2                                    | Observational | USA <sup>89</sup>                | Delta                                        | 52.4% (48–56.4), documented infection                               |
| mRNA-1273                                   | Observational | USA <sup>89</sup>                | Delta                                        | 50.6% (45–55.7), documented infection                               |
| BNT162b2                                    | Observational | UK <sup>90</sup>                 | Alpha                                        | 77% (56-88), 80+ years, documented infection, interval 19-29 days   |
| BNT162b2                                    | Observational | UK <sup>90</sup>                 | Alpha                                        | 90% (83-94), 80+ years, documented infection, interval 65-84 days   |
| BNT162b2                                    | Observational | UK <sup>90</sup>                 | Alpha                                        | 77% (66-85), 65-79 years, documented infection, interval 19-29 days |
| BNT162b2                                    | Observational | UK <sup>90</sup>                 | Alpha                                        | 89% (86-92), 65-79 years, documented infection, interval 65-84 days |
| BNT162b2 and mRNA-1273                      | Observational | USA <sup>60</sup>                | Non-VOC and Alpha                            | 91 % (83-95), symptomatic                                           |
| BNT162b2                                    | Observational | UK <sup>91</sup>                 | Original and Alpha                           | 93.3% (85.8-96.8), symptomatic                                      |
| ChAdOx1                                     | Observational | UK <sup>91</sup>                 | Original and Alpha                           | 78% (69.7-84)                                                       |
| BNT162b2 and mRNA-1273                      | Observational | Qatar <sup>92</sup>              | Original, Alpha and Beta                     | 78% (72-83) documented infection                                    |
| BNT162b2                                    | Observational | France <sup>93</sup>             | Alpha                                        | 86% (81-90) symptomatic                                             |
| Sputnik V                                   | Observational | Russian Federation <sup>52</sup> | Delta                                        | 100% against ICU admission, 99.5% (98.5-99.9) against death         |
| BNT162b2                                    | Observational | USA <sup>11</sup>                | B.1.427/.429 and Alpha                       | 87% (68.6-94.6) infection                                           |
| mRNA-1273                                   | Observational | USA <sup>11</sup>                | B.1.427/.429 and Alpha                       | 86.2% (68.4-93.9) infection                                         |

## References

- 1 Ella R, Reddy S, Blackwelder W, *et al.* Efficacy, safety, and lot to lot immunogenicity of an inactivated SARS-CoV-2 vaccine (BBV152): a, double-blind, randomised, controlled phase 3 trial. *medRxiv* 2021; : 2021.06.30.21259439.
- 2 Basu A. Review of: 'Efficacy, safety, and lot to lot immunogenicity of an inactivated SARS-CoV-2 vaccine (BBV152): a double-blind, randomised, controlled phase 3 trial'. *Qeios* 2021. DOI:10.32388/r013ib.
- 3 Abu-Raddad LJ, Chemaitelly H, Butt AA. Effectiveness of the BNT162b2 Covid-19 Vaccine against the B.1.1.7 and B.1.351 Variants. *N Engl J Med* 2021; **385**. DOI:10.1056/nejmc2104974.
- 4 Abu-Raddad LJ, Chemaitelly H, Yassine HM, *et al.* Pfizer-BioNTech mRNA BNT162b2 Covid-19 vaccine protection against variants of concern after one versus two doses. *J Travel Med* 2021. DOI:10.1093/jtm/taab083.
- 5 Health IM of. Two dose vaccination data. 2021. 2021.
- 6 Lefevre B, Tondeur L, Madec Y, *et al.* Impact of B.1.351 (beta) SARS-CoV-2 variant on BNT162b2 mRNA vaccine effectiveness in long-term care facilities of eastern France: a retrospective cohort study. *medRxiv* 2021; **351**.
- 7 Hall VJ, Foulkes S, Saei A, *et al.* COVID-19 vaccine coverage in health-care workers in England and effectiveness of BNT162b2 mRNA vaccine against infection (SIREN): a prospective, multicentre, cohort study. *Lancet* 2021; **397**. DOI:10.1016/S0140-6736(21)00790-X.
- 8 Stowe J, Andrews N, Gower C, *et al.* Effectiveness of COVID-19 vaccines against hospital admission with the Delta (B.1.617.2) variant. *Public Heal Engl* 2021; **37**.
- 9 Tartof SY, Slezak JM, Fischer H, *et al.* Six-Month Effectiveness of BNT162B2 mRNA COVID-19 Vaccine in a Large US Integrated Health System: A Retrospective Cohort Study. *SSRN Electron J* 2021. DOI:10.2139/ssrn.3909743.
- 10 Baum U, Poukka E, Palmu AA, Salo H, Lehtonen TO, Leino T. Effectiveness of vaccination against SARS-CoV-2 infection and Covid-19 hospitalization among Finnish elderly and chronically ill – An interim analysis of a nationwide cohort study. *medRxiv* 2021.
- 11 Kristin L. Andrejko, BS1, Jake Pry JFM, Nicholas P. Jewell J, Openshaw, Watt J, Seema Jain, Joseph A. Lewnard *et al*, Team behalf of the CC-19 C-CS. Prevention of COVID-19 by mRNA-based vaccines within the general population of California. *Clin Infect Dis* 2021.
- 12 Williams C, Al-Bargash D, Macalintal C, *et al.* COVID-19 Outbreak Associated with a SARS-CoV-2 P.1 Lineage in a Long-Term Care Home after Implementation of a Vaccination Program – Ontario, April-May 2021. *Clin Infect Dis* 2021. DOI:10.1093/cid/ciab617.
- 13 Sadoff J, Gray G, Vandebosch A, *et al.* Safety and Efficacy of Single-Dose Ad26.COV2.S Vaccine against Covid-19. *N Engl J Med* 2021; **384**. DOI:10.1056/nejmoa2101544.
- 14 Nasreen S, He Msc S, Mph HC, *et al.* Effectiveness of COVID-19 vaccines against variants of concern, Canada on behalf of the Canadian Immunization Research Network (CIRN) Provincial Collaborative Network (PCN) Investigators. *medRxiv* 2021.
- 15 Pramod S, Govindan D, Ramasubramani P, Kar SS, Aggarwal R, group J vaccine effectiveness study. Effectiveness of Covishield vaccine in preventing Covid-19 — A test-negative case-control study. *medRxiv* 2021.
- 16 Thiruvengadam R, Awasthi A, Medigeshi G, *et al.* Cellular Immune Responses are Preserved and May Contribute to Chadox1 ChAdOx1 nCoV-19 Vaccine Effectiveness Against Infection Due to SARS-CoV-2 B-1-617-2 Delta Variant Despite Reduced Virus Neutralisation. *SSRN Electron J* 2021. DOI:10.2139/ssrn.3884946.
- 17 Hitchings M, Ranzani OT, Dorion M, *et al.* Effectiveness of the ChAdOx1 vaccine in the elderly during SARS-CoV-2 Gamma variant transmission in Brazil. *medRxiv* 2021.
- 18 Li X-N, Huang Y, Wang W, *et al.* Effectiveness of inactivated SARS-CoV-2 vaccines against the Delta variant infection in Guangzhou: a test-negative case-control real-world study. *Emerg Microbes Infect* 2021; **10**. DOI:10.1080/22221751.2021.1969291.
- 19 Ranzani OT, Hitchings MDT, Dorion M, *et al.* Effectiveness of the CoronaVac vaccine in older adults during a gamma variant associated epidemic of covid-19 in Brazil: test negative case-control study. *BMJ* 2021. DOI:10.1136/bmj.n2015.
- 20 Ranzani OT, Hitchings M, Dorion Nieto M, *et al.* Effectiveness of the CoronaVac vaccine in the elderly population during a P.1 variant-associated epidemic of COVID-19 in Brazil: A test-negative case-control study. *medRxiv* 2021.
- 21 Jara A, Undurraga EA, González C, *et al.* Effectiveness of an Inactivated SARS-CoV-2 Vaccine in Chile. *N Engl J Med* 2021; **385**. DOI:10.1056/nejmoa2107715.
- 22 Chia PY, Xiang Ong SW, Chiew CJ, *et al.* Virological and serological kinetics of SARS-CoV-2 Delta variant vaccine-breakthrough infections: a multi-center cohort study. *medRxiv* 2021.
- 23 Chung H, He S, Nasreen S, *et al.* Effectiveness of BNT162b2 and mRNA-1273 covid-19 vaccines against symptomatic SARS-CoV-2 infection and severe covid-19 outcomes in Ontario, Canada: test negative design study. *BMJ* 2021. DOI:10.1136/bmj.n1943.
- 24 Emborg H-D, Valentiner-Branth P, Schelde AB, *et al.* Vaccine effectiveness of the BNT162b2 mRNA COVID-19 vaccine against RT-PCR confirmed SARS-CoV-2 infections, hospitalisations and mortality in prioritised risk groups. *medRxiv* 2021.
- 25 Chung H, He S, Nasreen S, *et al.* Effectiveness of BNT162b2 and mRNA-1273 COVID-19 Vaccines Against Symptomatic SARS-CoV-2 Infection and Severe COVID-19 Outcomes in Ontario, Canada. *SSRN Electron J* 2021. DOI:10.2139/ssrn.3845993.
- 26 Gram MA, Emborg H-D, Moustsen-Helms IR, *et al.* Vaccine effectiveness when combining the ChAdOx1 vaccine as the first dose with an mRNA COVID-19 vaccine as the second dose. *medRxiv* 2021.
- 27 Bruxvoort, Katia and Sy, Lina S. and Qian, Lei and Ackerson, Bradley K. and Luo, Yi and Lee, Gina S. and Tian, Yun and Florea, Ana and Takhar, Harpreet S. and Tubert, Julia E. and Talarico, Carla A. and Tseng HF. Real-World Effectiveness of the mRNA-1273 Vaccine Against COVID-19: Interim Results from a Prospective Observational Cohort Study. *SSRN Electron J* 2021.
- 28 Tang P, Hasan MR, Chemaitelly H, *et al.* BNT162b2 and mRNA-1273 COVID-19 vaccine effectiveness against the Delta (B.1.617.2) variant in Qatar. *medRxiv* 2021.
- 29 Public Health England U. COVID-19 vaccine surveillance report Week 26. .
- 30 Bhattacharya A, Ranjan P, Ghosh T, *et al.* Evaluation of the dose-effect association between the number of doses and duration since the last dose of COVID-19 vaccine, and its efficacy in preventing the disease and reducing disease severity: A single centre, cross-sectional analytical study from India. *Diabetes Metab Syndr Clin Res Rev* 2021; **15**. DOI:10.1016/j.dsx.2021.102238.
- 31 Haas EJ, Angulo FJ, McLaughlin JM, *et al.* Impact and effectiveness of mRNA BNT162b2 vaccine against SARS-CoV-2 infections and COVID-19 cases, hospitalisations, and deaths following a nationwide vaccination campaign in Israel: an observational study using national surveillance data. *Lancet* 2021; **397**. DOI:10.1016/S0140-6736(21)00947-8.
- 32 Dagan N, Barda N, Kepten E, *et al.* BNT162b2 mRNA Covid-19 Vaccine in a Nationwide Mass Vaccination Setting. *N Engl J Med* 2021; **384**.
- 33 Goldberg Y, Mandel M, Woodbridge Y, *et al.* Protection of previous SARS-CoV-2 infection is similar to that of BNT162b2 vaccine protection: A three-month nationwide experience from Israel. *medRxiv* 2021.
- 34 Regev-Yochay G, Amit S, Bergwerk M, *et al.* Decreased infectivity following BNT162b2 vaccination: A prospective cohort study in Israel. *Lancet Reg Heal - Eur* 2021; **7**. DOI:10.1016/j.lanpe.2021.100150.
- 35 Flacco ME, Soldato G, Martellucci CA, *et al.* Interim estimates of covid-19 vaccine effectiveness in a mass vaccination setting: Data from an italian province. *Vaccines* 2021; **9**. DOI:10.3390/vaccines9060628.
- 36 Butt AA, Omer SB, Yan P, Shaikh OS, Mayr FB. SARS-CoV-2 Vaccine Effectiveness in a High-Risk National Population in a Real-World Setting. *Ann Intern Med* 2021. DOI:10.7326/m21-1577.
- 37 Saciuk Y, Kertes J, Mandel M, Hemo B, Shamir Stein N, Zohar AE. Pfizer-BioNTech Vaccine Effectiveness Against SARS-CoV-2 Infection: Findings From a Large Observational Study in Israel. *SSRN Electron J* 2021. DOI:10.2139/ssrn.3868853.
- 38 Young-Xu Y, Korves C, Roberts J, *et al.* Coverage and effectiveness of mRNA SARS-CoV-2 vaccines among United States Veterans. *medRxiv* 2021.
- 39 Hyer R. COVID-19 Vaccine Update. WHO R&D BLUEPRINT CONSULTATION: Considerations in boosting COVID vaccine immune responses - Additional evidence on booster doses: developers' perspective. 2021. <https://www.who.int/news-room/events/detail/2021/08/13/default-calendar/who-consultation-on-covid-19-vaccines-research-13-august-2021>.
- 40 Heath PT, Galiza EP, Burns F, Chadwick DR, Clark R, Cosgrove C. Efficacy of the NVX-CoV2373 Covid-19 Vaccine Against the B.1.1.7 Variant. *MedRxiv* 2021.
- 41 Puranik A, Lenehan P, Silvert E, *et al.* Comparison of Two Highly-Effective mRNA Vaccines for COVID-19 During Periods of Alpha and Delta Variant Prevalence. *SSRN Electron J* 2021. DOI:10.2139/ssrn.3902782.
- 42 Rosenberg ES, Holtgrave DR, Dorabawila V, *et al.* New COVID-19 Cases and Hospitalizations Among Adults, by Vaccination Status — New York, May 3–July 25, 2021. *MMWR Morb Mortal Wkly Rep* 2021; **70**. DOI:10.15585/mmwr.mm7034e1.
- 43 Goldberg Y, Mandel M, Bar-On YM, *et al.* Waning immunity of the BNT162b2 vaccine: A nationwide study from Israel. *medRxiv* 2021. DOI:doi: <https://doi.org/10.1101/2021.08.24.21262423>.
- 44 Heather M. Scoobie, P Amelia G. Johnson, Amitabh B. Suthar, Rachel Severson, Nisha B. Alden, Sharon Balter, Daniel Bertolino, David Blythe, Shane Brady, Betsy Cadwell, MSPH1; Iris Cheng, Sherri Davidson, Janelle Delgadillo, Katelynn Deviney, Jeff Duchin, MDRBJS. Monitoring Incidence of COVID-19 Cases, Hospitalizations, and Deaths, by Vaccination Status — 13 U.S. Jurisdictions, April 4–July 17, 2021. *MMWR Morb Mortal Wkly Rep* 2021. DOI:DOI: [http://dx.doi.org/10.15585/mmwr.mm7037e1external icon](http://dx.doi.org/10.15585/mmwr.mm7037e1external%20icon).
- 45 Keehner J, Horton LE, Binkin NJ, *et al.* Resurgence of SARS-CoV-2 Infection in a Highly Vaccinated Health System Workforce. *N Engl J Med* 2021. DOI:10.1056/nejmc2112981.
- 46 Israel A, Merzon E, Schäffer AA, *et al.* Elapsed time since BNT162b2 vaccine and risk of SARS-CoV-2 infection in a large cohort. *medRxiv Prepr Serv Heal Sci* 2021. DOI:10.1101/2021.08.03.21261496.
- 47 Tenforde MW, Olson SM, Self WH, *et al.* Effectiveness of Pfizer-BioNTech and Moderna Vaccines Against COVID-19 Among Hospitalized Adults Aged ≥65 Years — United States, January–March 2021. *MMWR Recomm Reports* 2021; **70**. DOI:10.15585/mmwr.mm7018e1.
- 48 Tenforde MW, Patel MM, Ginde AA, *et al.* Effectiveness of SARS-CoV-2 mRNA Vaccines for Preventing Covid-19 Hospitalizations in the United States. *Clin Infect Dis* 2021. DOI:10.1093/cid/ciab687.
- 49 Fiona P. Havers, Huong Pham, Christopher A. Taylor, Michael Whitaker, Kadam Patel, Onika Anglin, Anita K. Kambhampati, Jennifer Milucky, Elizabeth Zell, Shua J. Chai, Pam Daily Kirley, Nisha B. Alden, Isaac Armistead, Kimberly Yousey-Hindes, James Meek, K MM. COVID-19-associated hospitalizations among vaccinated and unvaccinated adults > 18 years - COVID-NET, 13 states, January 1-July 24, 2021. *medRxiv Prepr Serv Heal Sci* 2021. DOI:doi: <https://doi.org/10.1101/2021.08.27.21262356>.

- 50 Thompson Mark G, Stenehjem Edward, Grannis Shawn, Ball Sarah W et al. Effectiveness of Covid-19 Vaccines in Ambulatory and Inpatient Care Settings. *New Engl J Med* 2021. DOI:10.1056/NEJMoa2110362.
- 51 Chemaitelly H, Yassine HM, Benslimane FM, et al. mRNA-1273 COVID-19 vaccine effectiveness against the B.1.1.7 and B.1.351 variants and severe COVID-19 disease in Qatar. *Nat Med* 2021. DOI:10.1038/s41591-021-01446-y.
- 52 Barchuk A, Cherkashin M, Bulina A, et al. Vaccine Effectiveness against Referral to Hospital and Severe Lung Injury Associated with COVID-19: A Population-based Case-control Study in St. Petersburg, Russia. *medRxiv* 2021; : 2021.08.18.21262065.
- 53 Zhiliang Hu, Bilin Tao, Zhongqi Li, Yan Song, Changhua Yi, Junwei Li, Meng Zhu, Yongxiang Yi, Peng Huang JW. Effectiveness of inactive COVID-19 vaccines against severe illness in B.1.617.2 (Delta) variant-infected patients in Jiangsu, China. *medRxiv Prepr Serv Heal Sci* 2021. DOI:https://doi.org/10.1101/2021.09.02.21263010.
- 54 Baltazar Nunes, Ana Paula Rodrigues, Irina Kislaya, Camila Cruz, André Peralta-Santos, João Lima, Pedro Pinto Leite, Duarte Sequeira, Carlos Matias Dias AM. mRNA vaccines effectiveness against COVID-19 hospitalizations and deaths in older adults: a cohort study based on data-linkage of national health registries in Portugal. *medRxiv Prepr Serv Heal Sci* 2021. DOI:doi: https://doi.org/10.1101/2021.08.27.21262731.
- 55 Shaun J. Grannis, Elizabeth A. Rowley, Toan C. Ong, Edward Stenehjem, Nicola P. Klein, MD, Malini B. DeSilva, Allison L. Naleway, Karthik Natarajan, Mark G. Thompson VN. Interim Estimates of COVID-19 Vaccine Effectiveness Against COVID-19–Associated Emergency Department or Urgent Care Clinic Encounters and Hospitalizations Among Adults During SARS-CoV-2 B.1.617.2 (Delta) Variant Predominance — Nine States, June–August 2021. *MMWR Morb Mortal Wkly Rep* 2021. DOI:DOI: http://dx.doi.org/10.15585/mmwr.mm7037e2.
- 56 Kristina L. Bajema, Rebecca M. Dahl, Mila M. Prill, Elissa Meites, Maria C. Rodriguez-Barradas, Vincent C. Marconi, David O. Beenhouwer, Sheldon T. Brown, Mark Holodniy, Cynthia Lucero-Obusan, Gilberto Rivera-Dominguez, Rosalba Gomez Morones, Alexis Whitm SC-19; SG. Effectiveness of COVID-19 mRNA Vaccines Against COVID-19–Associated Hospitalization — Five Veterans Affairs Medical Centers, United States, February 1–August 6, 2021. *MMWR Morb Mortal Wkly Rep* DOI:DOI: http://dx.doi.org/10.15585/mmwr.mm7037e3.
- 57 Tenforde MW, Self WH, Naioti EA et al. Sustained Effectiveness of Pfizer-BioNTech and Moderna Vaccines Against COVID-19 Associated Hospitalizations Among Adults — United States, March–July 2021. *MMWR Morb Mortal Wkly Rep* 2021; **70**: 1156–62.
- 58 Corchado-Garcia J, Puyraimond-Zemmour D, Hughes T, et al. Real-World Effectiveness of Ad26.COV2.S Adenoviral Vector Vaccine for COVID-19. *SSRN Electron J* 2021. DOI:10.2139/ssrn.3835737.
- 59 Bianchi FP, Tafuri S, Migliore G, et al. BNT162B2 mRNA Covid-19 Vaccine Effectiveness in the Prevention of SARS-CoV-2 Infection and Symptomatic Disease in the Medium - to Long-Term: A Retrospective Cohort Study. *SSRN Electron J* 2021. DOI:10.2139/ssrn.3894959.
- 60 Kim SS, Chung JR, Belongia EA, et al. mRNA Vaccine Effectiveness against COVID-19 among Symptomatic Outpatients Aged ≥16 Years in the United States, February – May 2021. *J Infect Dis* 2021.
- 61 Layan M, Gilboa M, Gonen T, et al. Impact of BNT162b2 vaccination and isolation on SARS-CoV-2 transmission in Israeli households: an observational study. *medRxiv* 2021.
- 62 Alali WQ, Ali LA, AlSeaidan M, Al-Rashidi M. Effectiveness of BNT162b2 and ChAdOx1 vaccines against symptomatic COVID-19 among Healthcare Workers in Kuwait: A retrospective cohort study. *medRxiv* 2021.
- 63 Pouwels KB, Pritchard E, Matthews P, et al. Impact of Delta on viral burden and vaccine effectiveness against new SARS-CoV-2 infections in the UK. *medRxiv* 2021.
- 64 Yassi A, Grant JM, Lockhart K, et al. Full title: 2 Infection control, occupational and public health measures including mRNA-based 3 vaccination against SARS-CoV-2 infections to protect healthcare workers from variants of. *medRxiv* 2021.
- 65 Elina Seppälä, Lamprini Veneti2, icon, Jostein Starrfelt, Anders Skyrud Danielsen, Karoline Bragstad , Olav Hungnes, Arne Michael Taxt , Sara Viksmoen Watle HM. Vaccine effectiveness against infection with the Delta (B.1.617.2) variant, Norway, April to August 2021. *Eurosurveillance* 2021; **April-August**. DOI:https://doi.org/10.2807/1560-7917.ES.2021.26.35.2100793.
- 66 Mark A. Katz, Efrat Bron Harlev, Bibiana Chazan, Michal Chowers, David Greenberg, Alon Peretz, Sagi Tshori, Joseph Levy, Mili Yacobi, Avital Hirsch, Doron Amichay, Ronit Weinberger, Anat Ben Dor, Elena Keren Taraday, Dana Reznik, Chen Barazani Chayat, Dan RDB. Covid-19 Vaccine Effectiveness in Healthcare Personnel in six Israeli Hospitals (CoVEHPI). *medRxiv Prepr Serv Heal Sci* 2021. DOI:doi: https://doi.org/10.1101/2021.08.30.21262465.
- 67 Angel Y, Spitzer A, Henig O, et al. Association between Vaccination with BNT162b2 and Incidence of Symptomatic and Asymptomatic SARS-CoV-2 Infections among Health Care Workers. *JAMA - J Am Med Assoc* 2021; **325**. DOI:10.1001/jama.2021.7152.
- 68 Zacay G, Shasha D, Bareket R, et al. BNT162b2 Vaccine Effectiveness in Preventing Asymptomatic Infection With SARS-CoV-2 Virus: A Nationwide Historical Cohort Study. *Open Forum Infect Dis* 2021; **8**. DOI:10.1093/ofid/ofab262.
- 69 Heymann AD, Zacay G, Shasha D, et al. BNT162b2 Vaccine Effectiveness in Preventing Asymptomatic Infection with SARS-CoV-2 Virus: A Nationwide Historical Cohort Study. *SSRN Electron J* 2021. DOI:10.2139/ssrn.3796868.
- 70 Pritchard E, Matthews PC, Stoesser N, et al. Impact of vaccination on new SARS-CoV-2 infections in the United Kingdom. *Nat Med* 2021; **27**. DOI:10.1038/s41591-021-01410-w.
- 71 Pritchard E, Matthews PC, Stoesser N, et al. Impact of vaccination on SARS-CoV-2 cases in the community: a population-based study using the UK’s COVID-19 Infection Survey. *medRxiv* 2021.
- 72 Sheikh A, McMenamin J, Taylor B, Robertson C. SARS-CoV-2 Delta VOC in Scotland: demographics, risk of hospital admission, and vaccine effectiveness. *Lancet*. 2021; **397**. DOI:10.1016/S0140-6736(21)01358-1.
- 73 Bernal JL, Andrews N, Gower C, et al. Early effectiveness of COVID-19 vaccination with BNT162b2 mRNA vaccine and ChAdOx1 adenovirus vector vaccine on symptomatic disease, hospitalisations and mortality in older adults in England. *medRxiv* 2021.
- 74 Lopez Bernal J, Andrews N, Gower C, et al. Effectiveness of Covid-19 Vaccines against the B.1.617.2 (Delta) Variant. *N Engl J Med* 2021; **385**. DOI:10.1056/nejmoa2108891.
- 75 Bernal JL, Andrews N, Gower C, et al. Effectiveness of COVID-19 vaccines against the B . 1 . 617 . 2 variant Background. *Preprint* 2021.
- 76 Skowronski DM, Setayeshgar S, Zou M, et al. Single-dose mRNA Vaccine Effectiveness Against Severe Acute Respiratory Syndrome Coronavirus 2 (SARS-CoV-2), Including Alpha and Gamma Variants: A Test-negative Design in Adults 70 Years and Older in British Columbia, Canada. *Clin Infect Dis* 2021. DOI:10.1093/cid/ciab616.
- 77 Skowronski DM, Setayeshgar S, Zou M, et al. Single-dose mRNA vaccine effectiveness against SARS-CoV-2, including P.1 and B.1.1.7 variants: a test-negative design in adults 70 years and older in British Columbia, Canada. *medRxiv* 2021.
- 78 Carazo S, Talbot D, Boulianne N, et al. Single-dose mRNA vaccine effectiveness against SARS-CoV-2 in healthcare workers extending 16 weeks post-vaccination: a test-negative design from Quebec, Canada. *Clin Infect Dis* 2021.
- 79 S LSRGCBNSCKKSTLODHAHSBMBDCSJTWFLJRTG d. TZWLADCRJJEYSIDISGEDH. An Observational Cohort Study on the Incidence of Severe Acute Respiratory Syndrome Coronavirus 2 (SARS-CoV-2) Infection and B.1.1.7 Variant Infection in Healthcare Workers by Antibody and Vaccination Status. *Clin Infect Dis* 2021. DOI:10.1093/cid/ciab608.
- 80 Kissling E, Hooiveld M, Sandonis Martin V, et al. Vaccine effectiveness against symptomatic SARS-CoV-2 infection in adults aged 65 years and older in primary care: I-MOVE-COVID-19 project, Europe, December 2020 to May 2021. *Euro Surveill* 2021; **26**. DOI:10.2807/1560-7917.ES.2021.26.29.2100670.
- 81 Bailly B, Guilpain L, Bouiller K, et al. BNT162b2 Messenger RNA Vaccination Did Not Prevent an Outbreak of Severe Acute Respiratory Syndrome Coronavirus 2 Variant 501Y.V2 in an Elderly Nursing Home but Reduced Transmission and Disease Severity. *Clin Infect Dis* 2021. DOI:10.1093/cid/ciab446.
- 82 Yassi A, Grant JM, Lockhart K, et al. Infection control, occupational and public health measures including mRNA-based vaccination against SARS-CoV-2 infections to protect healthcare workers from variants of concern: A 14-month observational study using surveillance data. *PLoS One* 2021; **16**. DOI:10.1371/journal.pone.0254920.
- 83 Emary KRW, Golubchik T, Aley PK, et al. Efficacy of ChAdOx1 nCoV-19 (AZD1222) vaccine against SARS-CoV-2 variant of concern 202012/01 (B.1.1.7): an exploratory analysis of a randomised controlled trial. *Lancet* 2021; **397**. DOI:10.1016/S0140-6736(21)00628-0.
- 84 Emary KRW, Golubchik T, Aley PK, et al. Efficacy of ChAdOx1 nCoV-19&nbsp;(AZD1222)&nbsp;Vaccine Against SARS-CoV-2 VOC&nbsp;202012/01&nbsp;(B.1.1.7). *SSRN Electron J* 2021. DOI:10.2139/ssrn.3779160.
- 85 Madhi SA, Baillie V, Cutland CL, et al. Efficacy of the ChAdOx1 nCoV-19 Covid-19 Vaccine against the B.1.351 Variant. *N Engl J Med* 2021; **384**. DOI:10.1056/nejmoa2102214.
- 86 Vaishya R, Sibal A, Malani A, et al. Post-Vaccination Symptomatic SARS-CoV-2 Infections are Minimal and Non-Serious: An Observational Multicenter Indian Cohort Study of 28342 Healthcare Workers. *SSRN Electron J* 2021. DOI:10.2139/ssrn.3889352.
- 87 de Gier Brechje, Andeweg Stijn, Joosten Rosa, ter Schegget Ronald, Smorenburg Naomi, van de Kasstele Jan RC-19 surveillance and epidemiology team, 1,, Hahné Susan JM, van den Hof Susan, de Melker Hester E KMJ. Vaccine effectiveness against SARS-CoV-2 transmission and infections among household and other close contacts of confirmed cases, the Netherlands, February to May 2021. *Eurosurveillance* 2021; **26**. DOI:https://doi.org/10.2807/1560-7917.
- 88 Shinde V, Bhikha S, Hoosain Z, et al. Efficacy of NVX-CoV2373 Covid-19 Vaccine against the B.1.351 Variant. *N Engl J Med* 2021; **384**. DOI:10.1056/nejmoa2103055.
- 89 Nanduri S, Pilishvili T, Derado G, et al. Effectiveness of Pfizer-BioNTech and Moderna Vaccines in Preventing SARS-CoV-2 Infection Among Nursing Home Residents Before and During Widespread Circulation of the SARS-CoV-2 B.1.617.2 (Delta) Variant — National Healthcare Safety Network, March 1–August 1, 2021. *MMWR Morb Mortal Wkly Rep* 2021; **70**. DOI:10.15585/mmwr.mm7034e3.
- 90 Amirthalingam G, Bernal JL, Andrews NJ, et al. Higher serological responses and increased vaccine effectiveness demonstrate the value of extended vaccine schedules in combatting COVID-19 in England. *medRxiv* 2021.
- 91 Whitaker1 HJ, Tsang2 RS, Byford2 R, et al. Pfizer-BioNTech and Oxford AstraZeneca COVID-19 vaccine effectiveness and immune response among individuals in clinical risk groups. *RCGP* 2021.
- 92 Bertollini R, Chemaitelly H, Yassine HM, Al-Thani MH, Al-Khal A, Abu-Raddad LJ. Associations of Vaccination and of Prior Infection with Positive PCR Test Results for SARS-CoV-2 in Airline Passengers Arriving in Qatar. *JAMA - J. Am. Med. Assoc.* 2021; **326**. DOI:10.1001/jama.2021.9970.
- 93 Charmet T, Schaeffer L, Grant R, et al. Impact of original, B.1.1.7, and B.1.351/P.1 SARS-CoV-2 lineages on vaccine effectiveness of two doses of COVID-19 mRNA vaccines: Results from a nationwide case-control study in France. *Lancet Reg Heal - Eur* 2021; **8**. DOI:10.1016/j.lanepe.2021.100171.
